# Supplementary material
Source: publisher figshare collection journal article supplement (https://acs.figshare.com/ndownloader/files/4461085)
Supplement: Supplementary file 1 [file 4461085]

# *Supporting Information*

## Directed Evolution of an Enantioselective Lipase with Broad Substrate Scope for Hydrolysis of $\alpha$ -Substituted Esters

*Karin Engström, Jonas Nyhlén, Anders G. Sandström and Jan-E. Bäckvall\**

Department of Organic Chemistry, Arrhenius Laboratory, Stockholm University, SE-106 91  
Stockholm, Sweden

jeb@organ.su.se

|                                                                               |    |
|-------------------------------------------------------------------------------|----|
| I. General.....                                                               | S2 |
| II. Growth media recipes.....                                                 | S2 |
| III. Mutagenic primers.....                                                   | S2 |
| IV. Preparation of <i>p</i> -nitrophenyl esters <b>1-3</b> , <b>5-7</b> ..... | S2 |
| V. Preparation of <i>p</i> -nitrophenyl 2-phenylpentanoate ( <b>4</b> ).....  | S3 |
| VI. Preparation of ethyl 2-phenylpentanoate ( <b>8</b> ).....                 | S3 |
| VII. Preparation of nonyl 2-phenylpentanoate ( <b>9</b> ).....                | S3 |
| VIII. Preparation of phenyl 2-phenylpentanoate ( <b>10</b> ).....             | S4 |
| IX. Experimental data for <i>E</i> value determinations.....                  | S5 |
| X. Sequencing of DNA from interesting enzyme variants.....                    | S6 |
| XI. Preparation of active site pictures of the CalA variants.....             | S6 |
| XII. References.....                                                          | S7 |

## I. General

Unless otherwise noted, all materials were obtained from commercial suppliers and used without further purification. 2-Phenylpentanoic acid was synthesized according to literature procedure.<sup>[1]</sup> <sup>1</sup>H and <sup>13</sup>C NMR spectra were recorded at 400 MHz and 100 MHz respectively. Chemical shifts ( $\delta$ ) are reported in ppm, using the residual solvent peak in CDCl<sub>3</sub> ( $\delta_{\text{H}}$  7.26 and  $\delta_{\text{C}}$  77.0) as internal standard. GC analyses were performed using an IVADEX-1 chiral column.

## II. Growth media recipes

LB medium (10 mg/mL tryptone, 5 mg/mL yeast extract, 5 mg/mL NaCl, pH 7.0) was used for bacterial cultivation. YPD medium (10 mg/mL yeast extract, 20 mg/mL peptone, 20 mg/mL dextrose) was used for cultivation and expression in *P. pastoris*. YPDS (10 mg/mL yeast extract, 20 mg/mL peptone, 20 mg/mL dextrose, 1 M sorbitol) was used for cultivation of recently transformed *P. pastoris*.

## III. Mutagenic primers

The following primers were used for the mutagenesis (5'-3'):

Library FG (F233NDT/G237NDT)

LibFG\_fw GACCCTTCGCCGGCNDTGCCCTGGCGNDTGTTCGGGTC

LibFG\_rv GAGAGACCCGAAACAHNCGCCAGGGCAHNGCCGGCGAAG

Lib FI (F149NDT/I150NDT)

FI2\_fw GGCTTCAAAGCCGCCNDTNDTGCTGGCTACGAAG

FI2\_rv CTCTTCGTAGCCAGCAHNAHNGGCGGCTTTGAAG

## IV. Preparation of *p*-nitrophenyl esters 1-3, 5-7.

The corresponding acids of esters **1-3** and **5-7** was purchased from commercial sources. Acid (6.42 mmol), DMAP (78 mg, 0.64 mmol) and Et<sub>3</sub>N (0.94 mL, 6.74 mmol) were dissolved in dry DCM (10 mL) under argon and stirred at 0 °C for 15 min. *p*-Nitrophenyl chloroformate

(1.28 g, 6.36 mmol) dissolved in DCM (2 mL) was added to the reaction mixture that was then stirred at 0 °C for 2 h. The reaction mixture was diluted with DCM and extracted with HCl (0.1 M), NaHCO<sub>3</sub> (1 M) and finally with brine. The organic phase was dried over MgSO<sub>4</sub> and concentrated. Purification by flash column chromatography (Pentane/EtOAc) gave esters **1-3**, **5-7**, which were characterized by <sup>1</sup>H NMR spectroscopy, in yields between 49-92%.

#### **V. Preparation of *p*-nitrophenyl 2-phenylpentanoate (**4**).**

2-Phenylpentanoic acid was prepared by alkylation of the  $\alpha$ -position of ethyl 2-phenylacetate and subsequent hydrolysis to the acid, according to literature procedure.<sup>[1]</sup> The *p*-nitrophenyl ester **4** was then prepared from the acid in 78 % yield as described above. <sup>1</sup>H NMR (400 MHz, CDCl<sub>3</sub>):  $\delta$  = 1.00 (t,  $J$  = 7.4 Hz, 3H), 1.33-1.50 (m, 2H), 1.85-1.97 (m, 1H), 2.15-2.26 (m, 1H), 3.84 (t,  $J$  = 7.8 Hz, 1H), 7.17-7.23 (m, 2H), 7.31-7.44 (m, 5H), 8.25 (m, 2H) ppm. <sup>13</sup>C NMR (100 MHz, CDCl<sub>3</sub>):  $\delta$  = 13.8, 20.7, 35.4, 51.5, 122.4, 125.1, 127.7, 127.9, 128.9, 138.0, 145.3, 155.6, 171.8 ppm.

#### **VI. Preparation of ethyl 2-phenylpropanate (**8**).**

2-Phenylpropionic acid (0.50 g, 3.33 mmol) was dissolved in EtOH under argon in flame-dried glassware and was cooled to 0 °C. Thionyl chloride (0.73 mL, 10.0 mmol) was added dropwise, and the reaction mixture was refluxed at 95 °C for 3 h. The solution was allowed to cool to ambient temperature and the remaining thionyl chloride was quenched by addition of saturated aqueous NaHCO<sub>3</sub>. The resulting solution was extracted twice with EtOAc. The combined organic phases were washed with brine, dried over MgSO<sub>4</sub> and concentrated. Purification by flash column chromatography (Pentane/EtOAc) afforded 516 mg of the product (87% yield).

#### **VII. Preparation of nonyl 2-phenylpropanate (**9**).**

2-Phenylpropionic acid (100 mg, 0.66 mmol), 1-nonanol (0.46 mL, 2.66 mmol) and DMAP

(6.7 mg, 0.066 mmol) were dissolved in DCM (5 mL) and stirred at 0 °C for 30 min. DCC (150 mg, 0.73 mmol) was added while still at 0 °C, thereafter the reaction mixture was allowed to reach room temperature, stirred over night and then concentrated. The crude product was purified by flash column chromatography (Pentane/EtOAc 9.6:0.4) to give 122 mg of the product (67% yield).

### **VIII. Preparation of phenyl 2-phenylpropanate (10).**

2-Phenylpropionic acid (200 mg, 1.32 mmol), phenol (493 mg, 5.24 mmol) and DMAP (13.4 mg, 0.13 mmol) were dissolved in DCM (10 mL) and stirred at 0 °C for 30 min. DCC (300 mg, 1.46 mmol) was added while still at 0 °C, thereafter the reaction mixture was allowed to reach room temperature, stirred over night and then concentrated. The crude product was purified by flash column chromatography (Pentane/EtOAc 9:1) to give 174 mg of the product (59% yield).

## IX. Experimental data for *E* value determinations

| Substrate                                                                                       | Enzyme                                                                                          | Time (min) | Conv. (%) | ee <sub>p</sub> (%) | <i>E</i> | Mean <i>E</i>         |
|-------------------------------------------------------------------------------------------------|-------------------------------------------------------------------------------------------------|------------|-----------|---------------------|----------|-----------------------|
| 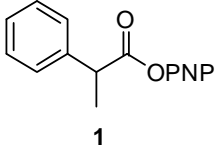<br><b>1</b>   | wt                                                                                              | 120        | 32        | 85.0                | 18       | 20 ± 2 ( <i>S</i> )   |
|                                                                                                 |                                                                                                 | 120        | 31        | 86.9                | 20       |                       |
|                                                                                                 |                                                                                                 | 120        | 47        | 82.9                | 23       |                       |
|                                                                                                 |                                                                                                 | 120        | 42        | 84.0                | 21       |                       |
|                                                                                                 | F233G                                                                                           | 2          | 22        | 98.8                | 218      | 259 ± 40 ( <i>R</i> ) |
|                                                                                                 |                                                                                                 | 2          | 17        | 99.2                | 303      |                       |
|                                                                                                 |                                                                                                 | 4          | 28        | 98.8                | 235      |                       |
|                                                                                                 |                                                                                                 | 4          | 31        | 98.9                | 280      |                       |
|                                                                                                 | YNG                                                                                             | 3          | 31        | 98.9                | 280      | 276 ± 24 ( <i>R</i> ) |
|                                                                                                 |                                                                                                 | 3          | 28        | 98.8                | 241      |                       |
|                                                                                                 |                                                                                                 | 4          | 33        | 98.9                | 294      |                       |
|                                                                                                 |                                                                                                 | 4          | 31        | 98.9                | 288      |                       |
| <br><b>2</b>  | wt                                                                                              | 240        | 22        | 57.3                | 4        | 4 ± 1 ( <i>S</i> )    |
|                                                                                                 |                                                                                                 | 240        | 24        | 54.7                | 4        |                       |
|                                                                                                 |                                                                                                 | 240        | 25        | 55.7                | 4        |                       |
|                                                                                                 |                                                                                                 | 240        | 21        | 54.7                | 4        |                       |
|                                                                                                 | F233G                                                                                           | 2          | 30        | 94.8                | 56       | 32 ± 16 ( <i>R</i> )  |
|                                                                                                 |                                                                                                 | 2          | 28        | 90.5                | 28       |                       |
|                                                                                                 |                                                                                                 | 3          | 29        | 87.8                | 22       |                       |
|                                                                                                 |                                                                                                 | 3          | 28        | 87.4                | 21       |                       |
|                                                                                                 | YNG                                                                                             | 4          | 38        | 94.3                | 61       | 63 ± 8 ( <i>R</i> )   |
|                                                                                                 |                                                                                                 | 4          | 33        | 94.1                | 52       |                       |
|                                                                                                 |                                                                                                 | 6          | 40        | 94.5                | 68       |                       |
|                                                                                                 |                                                                                                 | 6          | 39        | 94.8                | 70       |                       |
| <br><b>3</b> | wt                                                                                              | 240        | 7         | 30                  | 2        | 2 ± 1 ( <i>R</i> )    |
|                                                                                                 |                                                                                                 | 240        | 14        | 3                   | 1        |                       |
|                                                                                                 | F233G                                                                                           | 0.5        | 21        | 97.0                | 84       | 57 ± 20 ( <i>R</i> )  |
|                                                                                                 |                                                                                                 | 0.5        | 15        | 94.7                | 43       |                       |
|                                                                                                 |                                                                                                 | 0.5        | 21        | 94.1                | 42       |                       |
|                                                                                                 |                                                                                                 | 0.5        | 21        | 95.8                | 60       |                       |
|                                                                                                 | YNG                                                                                             | 1          | 11        | 96.6                | 64       | 79 ± 14 ( <i>R</i> )  |
|                                                                                                 |                                                                                                 | 2          | 19        | 97.2                | 88       |                       |
|                                                                                                 |                                                                                                 | 2          | 20        | 97.1                | 86       |                       |
|                                                                                                 | <br><b>4</b> | wt         | 270       | 11                  | 89.2     | 20                    |
| 270                                                                                             |                                                                                                 |            | 11        | 88.1                | 18       |                       |
| 270                                                                                             |                                                                                                 |            | 10        | 87.6                | 17       |                       |
| 270                                                                                             |                                                                                                 |            | 12        | 87.5                | 17       |                       |
| F233G                                                                                           |                                                                                                 | 2          | 25        | 98.0                | 133      | 88 ± 46 ( <i>R</i> )  |
|                                                                                                 |                                                                                                 | 2          | 27        | 97.6                | 116      |                       |
|                                                                                                 |                                                                                                 | 2          | 16        | 97.4                | 91       |                       |
|                                                                                                 |                                                                                                 | 4          | 37        | 95.2                | 71       |                       |
| YNG                                                                                             |                                                                                                 | 4          | 12        | 98.1                | 119      | 109 ± 13 ( <i>R</i> ) |
|                                                                                                 |                                                                                                 | 6          | 15        | 97.9                | 112      |                       |
|                                                                                                 |                                                                                                 | 6          | 15        | 97.5                | 95       |                       |

| Substrate                                                                               | Enzyme                                                                                 | Time (min) | Conv. (%) | ee <sub>p</sub> (%) | <i>E</i> | Mean <i>E</i>         |                     |
|-----------------------------------------------------------------------------------------|----------------------------------------------------------------------------------------|------------|-----------|---------------------|----------|-----------------------|---------------------|
| 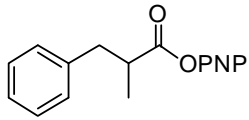<br>5  | wt                                                                                     | 240        | 8         | 84.1                | 12       | 10 ± 3 ( <i>S</i> )   |                     |
|                                                                                         |                                                                                        | 240        | 6         | 76.4                | 8        |                       |                     |
|                                                                                         | F233G                                                                                  | 4          | 5         | 53.0                | 3        | 3 ± 1 ( <i>R</i> )    |                     |
|                                                                                         |                                                                                        | 4          | 7         | 37.3                | 2        |                       |                     |
|                                                                                         |                                                                                        | 6          | 7         | 43.3                | 3        |                       |                     |
|                                                                                         |                                                                                        | 6          | 7         | 45.0                | 3        |                       |                     |
|                                                                                         | YNG                                                                                    | 15         | 27        | 97.0                | 93       | 84 ± 11 ( <i>R</i> )  |                     |
|                                                                                         |                                                                                        | 15         | 25        | 96.9                | 87       |                       |                     |
|                                                                                         |                                                                                        | 15         | 30        | 96.6                | 87       |                       |                     |
|                                                                                         |                                                                                        | 15         | 25        | 96.1                | 69       |                       |                     |
|                                                                                         | <br>6 | wt         | 3         | 15                  | 80.7     | 11                    | 11 ± 1 ( <i>S</i> ) |
|                                                                                         |                                                                                        |            | 3         | 13                  | 80.4     | 10                    |                     |
| 5                                                                                       |                                                                                        |            | 26        | 80.9                | 12       |                       |                     |
| F233G                                                                                   |                                                                                        | 2          | 27        | 83.9                | 15       | 17 ± 3 ( <i>R</i> )   |                     |
|                                                                                         |                                                                                        | 2          | 24        | 87.1                | 19       |                       |                     |
|                                                                                         |                                                                                        | 3          | 32        | 85.7                | 19       |                       |                     |
|                                                                                         |                                                                                        | 3          | 27        | 83.4                | 15       |                       |                     |
| YNG                                                                                     |                                                                                        | 2          | 12        | 96.6                | 66       | 104 ± 36 ( <i>R</i> ) |                     |
|                                                                                         |                                                                                        | 4          | 39        | 97.3                | 138      |                       |                     |
|                                                                                         |                                                                                        | 4          | 41        | 96.3                | 107      |                       |                     |
| <br>7 |                                                                                        | wt         | 120       | 27                  | 87.8     | 21                    | 19 ± 3 ( <i>S</i> ) |
|                                                                                         |                                                                                        |            | 120       | 20                  | 86.9     | 18                    |                     |
|                                                                                         | F233G                                                                                  | 3          | 9         | 96.2                | 56       | 54 ± 7 ( <i>R</i> )   |                     |
|                                                                                         |                                                                                        | 3          | 7         | 95.5                | 47       |                       |                     |
|                                                                                         |                                                                                        | 4          | 12        | 96.3                | 60       |                       |                     |
|                                                                                         | YNG                                                                                    | 3          | 6         | 95.4                | 45       | 45 ± 5 ( <i>R</i> )   |                     |
|                                                                                         |                                                                                        | 3          | 5         | 95.5                | 46       |                       |                     |
|                                                                                         |                                                                                        | 4          | 7         | 95.7                | 50       |                       |                     |
|                                                                                         |                                                                                        | 4          | 7         | 94.8                | 40       |                       |                     |

## X. Sequencing of DNA from interesting enzyme variants

Interesting enzyme variants from the screening were sequenced. Pelleted cells from master plates were used to inoculate YPD containing zeocin (100 µg/mL) and carbenicillin (100 µg/mL), and the cultures were shaken at 30 °C for 48 h. The plasmid was then extracted using a yeast plasmid kit, and subsequently transformed into *E. coli* DH5α in order to obtain a higher plasmid yield. The bacterial cells were cultivated and the plasmid preparations were produced and sequenced using appropriate primers.

## XI. Preparation of active site pictures of the CalA variants

Models of the enzyme variants with bound (*R*)-*p*-nitrophenyl 2-phenylpropanoate were based on the crystal structure (PDB ID: 2VEO).<sup>[2]</sup> The model was allowed to equilibrate for 1 ns by a molecular dynamics simulation using the MAB force field<sup>[3]</sup> implemented in the Moloc

computational package. An appropriate frame from the simulation was used for generating the pictures.<sup>[4]</sup>

## **XII. References**

- 
- [1] Terao, Y.; Miyamoto, K.; Ohta, H. *Chem Commun.* **2006**, *34*, 3600-3602.
  - [2] Ericsson, D. J.; Kasrayan, A.; Johansson, P.; Bergfors, T.; Sandström, A. G.; Bäckvall, J.-E.; Mowbray, S. L. *J. Mol. Biol.* **2008**, *376*, 109-119.
  - [3] Gerber, P. R. *J. Comput.-Aided Mol. Des.* **1998**, *12*, 37-51.
  - [4] Pictures were generated using the PyMOL software. (DeLano WL (**2002**) The PyMOL molecular graphics system <http://www.pymol.org>).
